# Supplementary material for: Analysis of streptococcal CRISPRs from human saliva reveals substantial sequence diversity within and between subjects over time
Source: HighWire-hosted journal article supplement (doi:10.1101/gr.111732.110), 2010-12-13
Supplement: Supplemental_Table_1.pdf [file Supplemental_Table_1.pdf]

Supplemental Table 1. Subject demographics

|                  | <b>Age</b> | <b>Gender</b> | <b>Race/Ethnicity</b> |
|------------------|------------|---------------|-----------------------|
| <b>Subject 1</b> | 35         | Male          | African American      |
| <b>Subject 2</b> | 31         | Female        | Asian                 |
| <b>Subject 3</b> | 24         | Female        | Asian                 |
| <b>Subject 4</b> | 29         | Male          | Caucasian             |
